# Supplementary material
Source: Royal Society of Chemistry journal article supplement (doi:10.1039/d6nr01198e)
Supplement: d6nr01198e1.pdf [file d6nr01198e1.pdf]

## Supporting Information for Decoupling CO<sub>2</sub> Reduction and Hydrogen Evolution Reaction on CuZn Alloys by Constructing Asymmetric Active Microenvironments

Shanlin Chen <sup>a, b</sup>, Haiyan Zhu <sup>\*a, b</sup>, Yuyuan Huang <sup>a, b</sup>, Yongle Wang <sup>a, b</sup>, Tingting Li <sup>a, b</sup>, Meeladi Ghulam <sup>b</sup>, Chou Wu <sup>b</sup>, Yawei Li <sup>\*c</sup>

<sup>a</sup>*Shaanxi Key Laboratory for Theoretical Physics Frontiers, Institute of Modern Physics, Northwest University, Xi'an, Shaanxi 710069, China*

<sup>b</sup>*Institute of Yulin Carbon Neutral College, Northwest University, Xi'an, Yulin 719000, China*

<sup>c</sup>*School of Energy, Power and Mechanical Engineering, Institute of Energy and Power Innovation, North China Electric Power University, Beijing 102206, China*

\*Author to whom correspondence should be addressed. Email: [zhuhaiyan@nwu.edu.cn](mailto:zhuhaiyan@nwu.edu.cn); [lywialyw@gmail.com](mailto:lywialyw@gmail.com)

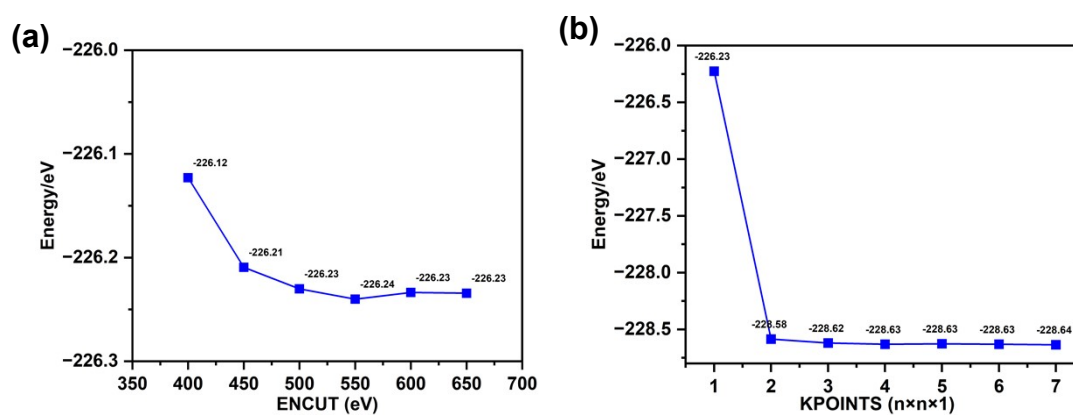

Figure S1. (a) Tests of the cutoff energy and (b) the K-point mesh.

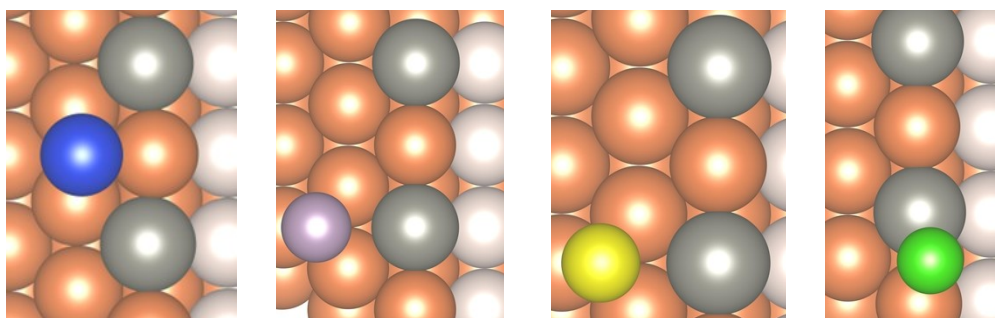

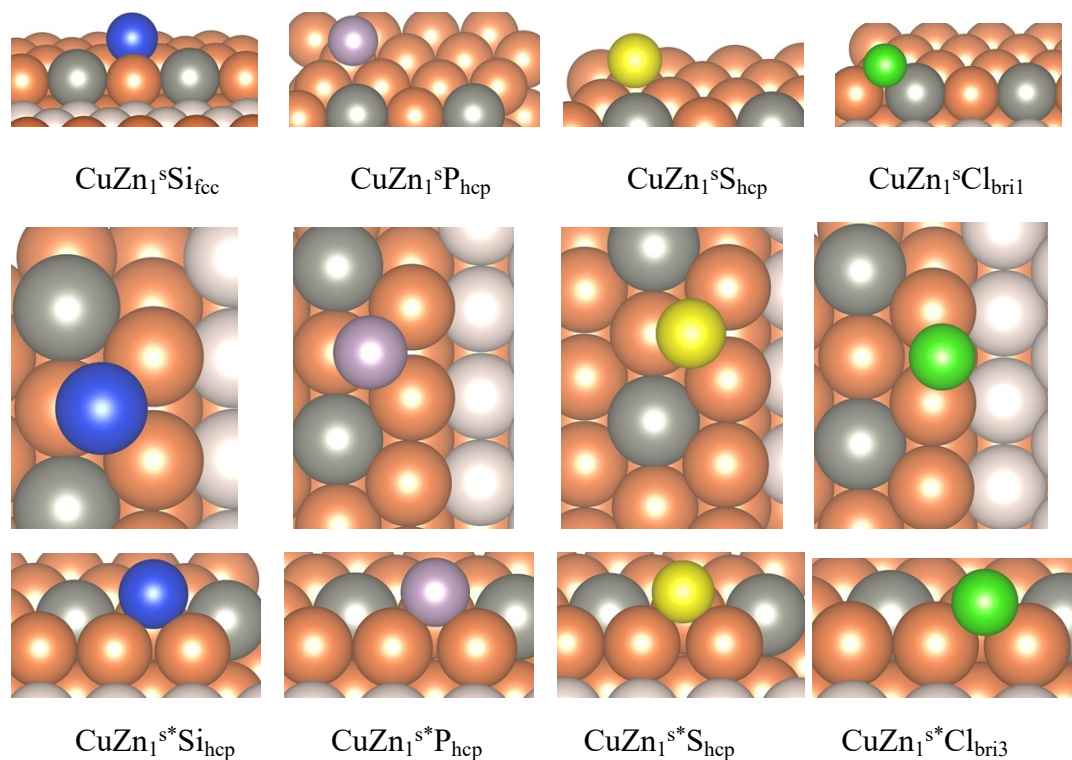

**Figure S2.** Top and side views of  $\text{CuZnX}$  structures ( $X = \text{Si}, \text{P}, \text{S}, \text{Cl}$ ).

**Table S1.** Formation energies of oxidized and reduced Zn clusters under solvation conditions ( $\epsilon=78.4$ ). All data were obtained at  $\Delta\mu_{\text{O}} = -2.5$  eV, i.e., under a hydrogen-rich environment.

| Cluster                   | Formation/eV ( $\Delta\mu_{\text{O}} = -2.5$ eV) |
|---------------------------|--------------------------------------------------|
| $\text{ZnO}^{\text{a}}$   | -0.07                                            |
| $\text{ZnOH}^{\text{a}}$  | -1.37                                            |
| $\text{Zn}_1^{\text{a}}$  | -1.52                                            |
| $\text{Zn}_1^{\text{s}}$  | -1.73                                            |
| $\text{Zn}_1^{\text{s}*}$ | -1.71                                            |
| $\text{Zn}_2^{\text{s}}$  | -1.68                                            |
| $\text{Zn}_2^{\text{s}*}$ | -1.61                                            |

**Table S2.** Vibrational frequencies of \*COOH, \*CO, COH, and H on CuZnX.

| Catalyst                                       | intermediate        | Vibrational frequencies |                |                              |                              |                |  |
|------------------------------------------------|---------------------|-------------------------|----------------|------------------------------|------------------------------|----------------|--|
| Zn <sub>1</sub> <sup>s</sup> Si <sub>fcc</sub> | *COOH               | 1 f = 105.481447 THz    | 662.759479 THz | 2PiTHz                       | 3518.482243 cm <sup>-1</sup> | 436.236357 meV |  |
|                                                |                     | 2 f = 50.343474 THz     | 316.317379 THz | 2PiTHz                       | 1679.277497 cm <sup>-1</sup> | 208.203949 meV |  |
|                                                |                     | 3 f = 36.739770 THz     | 230.842795 THz | 2PiTHz                       | 1225.506786 cm <sup>-1</sup> | 151.943531 meV |  |
|                                                |                     | 4 f = 29.229666 THz     | 183.655410 THz | 2PiTHz                       | 974.996692 cm <sup>-1</sup>  | 120.884227 meV |  |
|                                                |                     | 5 f = 19.902008 THz     | 125.048001 THz | 2PiTHz                       | 663.859494 cm <sup>-1</sup>  | 82.308117 meV  |  |
|                                                |                     | 6 f = 18.986982 THz     | 119.298728 THz | 2PiTHz                       | 633.337535 cm <sup>-1</sup>  | 78.523875 meV  |  |
|                                                |                     | 7 f = 11.173135 THz     | 70.202878 THz  | 2PiTHz                       | 372.695655 cm <sup>-1</sup>  | 46.208389 meV  |  |
|                                                |                     | 8 f = 8.226528 THz      | 51.688798 THz  | 2PiTHz                       | 274.407419 cm <sup>-1</sup>  | 34.022196 meV  |  |
|                                                |                     | 9 f = 7.397706 THz      | 46.481158 THz  | 2PiTHz                       | 246.760903 cm <sup>-1</sup>  | 30.594464 meV  |  |
|                                                |                     | 10 f = 4.352971 THz     | 27.350522 THz  | 2PiTHz                       | 145.199474 cm <sup>-1</sup>  | 18.002447 meV  |  |
|                                                |                     | 11 f = 3.744141 THz     | 23.525132 THz  | 2PiTHz                       | 124.891099 cm <sup>-1</sup>  | 15.484528 meV  |  |
|                                                |                     | 12 f = 0.956966 THz     | 6.012794 THz   | 2PiTHz                       | 31.920943 cm <sup>-1</sup>   | 3.957694 meV   |  |
|                                                | *CO                 | 1 f = 60.295599 THz     | 378.848421 THz | 2PiTHz                       | 2011.244629 cm <sup>-1</sup> | 249.362643 meV |  |
|                                                |                     | 2 f = 10.363543 THz     | 65.116060 THz  | 2PiTHz                       | 345.690569 cm <sup>-1</sup>  | 42.860183 meV  |  |
|                                                |                     | 3 f = 9.692328 THz      | 60.898693 THz  | 2PiTHz                       | 323.301253 cm <sup>-1</sup>  | 40.084261 meV  |  |
|                                                |                     | 4 f = 8.083065 THz      | 50.787393 THz  | 2PiTHz                       | 269.622007 cm <sup>-1</sup>  | 33.428880 meV  |  |
| 5 f = 5.036220 THz                             |                     | 31.643506 THz           | 2PiTHz         | 167.990225 cm <sup>-1</sup>  | 20.828141 meV                |                |  |
| 6 f = 2.653569 THz                             |                     | 16.672869 THz           | 2PiTHz         | 88.513547 cm <sup>-1</sup>   | 10.974285 meV                |                |  |
| *COH                                           | 1 f = 80.065180 THz | 503.064362 THz          | 2PiTHz         | 2670.686848 cm <sup>-1</sup> | 331.123087 meV               |                |  |
|                                                | 2 f = 51.103738 THz | 321.094255 THz          | 2PiTHz         | 1704.637154 cm <sup>-1</sup> | 211.348147 meV               |                |  |
|                                                | 3 f = 36.003226 THz | 226.214944 THz          | 2PiTHz         | 1200.938330 cm <sup>-1</sup> | 148.897430 meV               |                |  |
|                                                | 4 f = 19.412949 THz | 121.975153 THz          | 2PiTHz         | 647.546243 cm <sup>-1</sup>  | 80.285531 meV                |                |  |
|                                                | 5 f = 12.974406 THz | 81.520600 THz           | 2PiTHz         | 432.779601 cm <sup>-1</sup>  | 53.657851 meV                |                |  |
|                                                | 6 f = 8.617801 THz  | 54.147243 THz           | 2PiTHz         | 287.458901 cm <sup>-1</sup>  | 35.640374 meV                |                |  |
|                                                | 7 f = 4.935239 THz  | 31.009022 THz           | 2PiTHz         | 164.621853 cm <sup>-1</sup>  | 20.410516 meV                |                |  |
|                                                | 8 f = 3.090788 THz  | 19.419993 THz           | 2PiTHz         | 103.097584 cm <sup>-1</sup>  | 12.782476 meV                |                |  |
|                                                | 9 f = 1.943754 THz  | 12.212967 THz           | 2PiTHz         | 64.836654 cm <sup>-1</sup>   | 8.038723 meV                 |                |  |
| *H                                             | 1 f = 41.778533 THz | 262.502266 THz          | 2PiTHz         | 1393.581818 cm <sup>-1</sup> | 172.782187 meV               |                |  |
|                                                | 2 f = 23.519639 THz | 147.778248 THz          | 2PiTHz         | 784.530674 cm <sup>-1</sup>  | 97.269442 meV                |                |  |
|                                                | 3 f = 9.100224 THz  | 57.178396 THz           | 2PiTHz         | 303.550802 cm <sup>-1</sup>  | 37.635516 meV                |                |  |
| Zn <sub>1</sub> <sup>s</sup> Si <sub>hcp</sub> | *COOH               | 1 f = 105.620468 THz    | 663.632974 THz | 2PiTHz                       | 3523.119484 cm <sup>-1</sup> | 436.811302 meV |  |
|                                                |                     | 2 f = 48.689049 THz     | 305.922318 THz | 2PiTHz                       | 1624.091813 cm <sup>-1</sup> | 201.361794 meV |  |
|                                                |                     | 3 f = 36.674879 THz     | 230.435058 THz | 2PiTHz                       | 1223.342229 cm <sup>-1</sup> | 151.675160 meV |  |
|                                                |                     | 4 f = 29.009816 THz     | 182.217499 THz | 2PiTHz                       | 967.363055 cm <sup>-1</sup>  | 119.937776 meV |  |
|                                                |                     | 5 f = 19.054684 THz     | 119.724111 THz | 2PiTHz                       | 635.595824 cm <sup>-1</sup>  | 78.803867 meV  |  |
|                                                |                     | 6 f = 18.666937 THz     | 117.287827 THz | 2PiTHz                       | 622.661992 cm <sup>-1</sup>  | 77.200276 meV  |  |
|                                                |                     | 7 f = 8.171328 THz      | 51.341965 THz  | 2PiTHz                       | 272.566138 cm <sup>-1</sup>  | 33.793906 meV  |  |
|                                                |                     | 8 f = 7.602265 THz      | 47.766438 THz  | 2PiTHz                       | 253.584250 cm <sup>-1</sup>  | 31.440451 meV  |  |
|                                                |                     | 9 f = 6.488804 THz      | 40.770359 THz  | 2PiTHz                       | 216.443202 cm <sup>-1</sup>  | 26.835547 meV  |  |
|                                                |                     | 10 f = 4.435724 THz     | 27.870477 THz  | 2PiTHz                       | 147.959827 cm <sup>-1</sup>  | 18.344687 meV  |  |
|                                                |                     | 11 f = 3.242246 THz     | 20.371629 THz  | 2PiTHz                       | 108.149665 cm <sup>-1</sup>  | 13.408854 meV  |  |
|                                                |                     | 12 f = 3.182594 THz     | 19.996827 THz  | 2PiTHz                       | 106.159899 cm <sup>-1</sup>  | 13.162155 meV  |  |
|                                                | *CO                 | 1 f = 56.071124 THz     | 352.305260 THz | 2PiTHz                       | 1870.331304 cm <sup>-1</sup> | 231.891611 meV |  |
|                                                |                     | 2 f = 12.472362 THz     | 78.366161 THz  | 2PiTHz                       | 416.033197 cm <sup>-1</sup>  | 51.581561 meV  |  |
|                                                |                     | 3 f = 10.291156 THz     | 64.661242 THz  | 2PiTHz                       | 343.276016 cm <sup>-1</sup>  | 42.560817 meV  |  |
|                                                |                     | 4 f = 10.004472 THz     | 62.859950 THz  | 2PiTHz                       | 333.713246 cm <sup>-1</sup>  | 41.375184 meV  |  |
| 5 f = 5.463886 THz                             |                     | 34.330606 THz           | 2PiTHz         | 182.255603 cm <sup>-1</sup>  | 22.596823 meV                |                |  |
| 6 f = 1.000002 THz                             |                     | 6.283197 THz            | 2PiTHz         | 33.356468 cm <sup>-1</sup>   | 4.135676 meV                 |                |  |
| *COH                                           | 1 f = 82.238166 THz | 516.717635 THz          | 2PiTHz         | 2743.169853 cm <sup>-1</sup> | 340.109837 meV               |                |  |
|                                                | 2 f = 47.857090 THz | 300.694964 THz          | 2PiTHz         | 1596.340641 cm <sup>-1</sup> | 197.921086 meV               |                |  |
|                                                | 3 f = 35.957030 THz | 225.924683 THz          | 2PiTHz         | 1199.397381 cm <sup>-1</sup> | 148.706376 meV               |                |  |
|                                                | 4 f = 17.206770 THz | 108.113324 THz          | 2PiTHz         | 573.956046 cm <sup>-1</sup>  | 71.161506 meV                |                |  |
|                                                | 5 f = 12.413325 THz | 77.995220 THz           | 2PiTHz         | 414.063935 cm <sup>-1</sup>  | 51.337404 meV                |                |  |
|                                                | 6 f = 6.241671 THz  | 39.215758 THz           | 2PiTHz         | 208.199743 cm <sup>-1</sup>  | 25.813487 meV                |                |  |
|                                                | 7 f = 6.217431 THz  | 39.065270 THz           | 2PiTHz         | 207.391164 cm <sup>-1</sup>  | 25.713236 meV                |                |  |
|                                                | 8 f = 4.298941 THz  | 27.011040 THz           | 2PiTHz         | 143.397217 cm <sup>-1</sup>  | 17.778995 meV                |                |  |
|                                                | 9 f = 0.649853 THz  | 4.083144 THz            | 2PiTHz         | 21.676746 cm <sup>-1</sup>   | 2.687575 meV                 |                |  |
| *H                                             | 1 f = 37.813268 THz | 237.587768 THz          | 2PiTHz         | 1261.314805 cm <sup>-1</sup> | 156.383161 meV               |                |  |
|                                                | 2 f = 36.533564 THz | 229.547152 THz          | 2PiTHz         | 1218.628482 cm <sup>-1</sup> | 151.090730 meV               |                |  |
|                                                | 3 f = 7.957204 THz  | 49.996585 THz           | 2PiTHz         | 265.423733 cm <sup>-1</sup>  | 32.908361 meV                |                |  |
| Zn <sub>1</sub> <sup>s</sup> P <sub>hcp</sub>  | *COOH               | 1 f = 104.565257 THz    | 657.002888 THz | 2PiTHz                       | 3487.921438 cm <sup>-1</sup> | 432.447299 meV |  |
|                                                |                     | 2 f = 43.511222 THz     | 273.389072 THz | 2PiTHz                       | 1451.378104 cm <sup>-1</sup> | 179.948015 meV |  |
|                                                |                     | 3 f = 38.160701 THz     | 239.770756 THz | 2PiTHz                       | 1272.903932 cm <sup>-1</sup> | 157.820930 meV |  |
|                                                |                     | 4 f = 33.323933 THz     | 209.380446 THz | 2PiTHz                       | 1111.566720 cm <sup>-1</sup> | 137.816758 meV |  |
|                                                |                     | 5 f = 21.063246 THz     | 132.344280 THz | 2PiTHz                       | 702.594250 cm <sup>-1</sup>  | 87.110616 meV  |  |
|                                                |                     | 6 f = 20.300131 THz     | 127.549485 THz | 2PiTHz                       | 677.130461 cm <sup>-1</sup>  | 83.954623 meV  |  |
|                                                |                     | 7 f = 11.834014 THz     | 74.355303 THz  | 2PiTHz                       | 394.740206 cm <sup>-1</sup>  | 48.941566 meV  |  |
|                                                |                     | 8 f = 9.333397 THz      | 58.643463 THz  | 2PiTHz                       | 311.328604 cm <sup>-1</sup>  | 38.599841 meV  |  |
|                                                |                     | 9 f = 6.830286 THz      | 42.915951 THz  | 2PiTHz                       | 227.833801 cm <sup>-1</sup>  | 28.247801 meV  |  |
|                                                |                     | 10 f = 4.685443 THz     | 29.439508 THz  | 2PiTHz                       | 156.289560 cm <sup>-1</sup>  | 19.377443 meV  |  |
|                                                |                     | 11 f = 3.443685 THz     | 21.637311 THz  | 2PiTHz                       | 114.868962 cm <sup>-1</sup>  | 14.241941 meV  |  |
|                                                |                     | 12 f = 2.866366 THz     | 18.009906 THz  | 2PiTHz                       | 95.611662 cm <sup>-1</sup>   | 11.854340 meV  |  |
|                                                | *CO                 | 1 f = 60.486242 THz     | 380.046264 THz | 2PiTHz                       | 2017.603781 cm <sup>-1</sup> | 250.151077 meV |  |
|                                                |                     | 2 f = 11.012046 THz     | 69.190726 THz  | 2PiTHz                       | 367.322309 cm <sup>-1</sup>  | 45.542178 meV  |  |
|                                                |                     | 3 f = 9.725086 THz      | 61.104516 THz  | 2PiTHz                       | 324.393932 cm <sup>-1</sup>  | 40.219736 meV  |  |
|                                                |                     | 4 f = 8.783265 THz      | 55.186884 THz  | 2PiTHz                       | 292.978190 cm <sup>-1</sup>  | 36.324679 meV  |  |
| 5 f = 3.556083 THz                             |                     | 22.343526 THz           | 2PiTHz         | 118.618142 cm <sup>-1</sup>  | 14.706780 meV                |                |  |
| 6 f = 3.206639 THz                             |                     | 20.147906 THz           | 2PiTHz         | 106.961953 cm <sup>-1</sup>  | 13.261597 meV                |                |  |
| *COH                                           | 1 f = 84.271671 THz | 529.494524 THz          | 2PiTHz         | 2811.080279 cm <sup>-1</sup> | 348.519741 meV               |                |  |
|                                                | 2 f = 44.365827 THz | 273.788710 THz          | 2PiTHz         | 1479.884636 cm <sup>-1</sup> | 183.482376 meV               |                |  |
|                                                | 3 f = 38.138999 THz | 239.592245 THz          | 2PiTHz         | 1271.993158 cm <sup>-1</sup> | 157.695950 meV               |                |  |
|                                                | 4 f = 21.347397 THz | 134.129649 THz          | 2PiTHz         | 712.072481 cm <sup>-1</sup>  | 88.285767 meV                |                |  |
|                                                | 5 f = 14.164545 THz | 88.998460 THz           | 2PiTHz         | 472.478346 cm <sup>-1</sup>  | 58.579870 meV                |                |  |
|                                                | 6 f = 8.517548 THz  | 53.517335 THz           | 2PiTHz         | 284.114822 cm <sup>-1</sup>  | 35.225761 meV                |                |  |
|                                                | 7 f = 6.383065 THz  | 40.105980 THz           | 2PiTHz         | 212.916124 cm <sup>-1</sup>  | 26.398244 meV                |                |  |
|                                                | 8 f = 5.310562 THz  | 33.367243 THz           | 2PiTHz         | 177.141263 cm <sup>-1</sup>  | 21.962725 meV                |                |  |
|                                                | 9 f = 3.368582 THz  | 21.165426 THz           | 2PiTHz         | 112.363803 cm <sup>-1</sup>  | 13.931341 meV                |                |  |
| *H                                             | 1 f = 32.554995 THz | 204.549060 THz          | 2PiTHz         | 1085.017721 cm <sup>-1</sup> | 134.636686 meV               |                |  |
|                                                | 2 f = 26.671668 THz | 167.583932 THz          | 2PiTHz         | 889.671050 cm <sup>-1</sup>  | 110.305192 meV               |                |  |
|                                                | 3 f = 23.990834 THz | 150.738958 THz          | 2PiTHz         | 800.248073 cm <sup>-1</sup>  | 99.218151 meV                |                |  |

|                                                |       |                                                                                                                                                                                                                                                                                                                                                                                                                                                                                                                                                                                                                                                                                                                                                                                                                                                                                                                                                                                                                                           |
|------------------------------------------------|-------|-------------------------------------------------------------------------------------------------------------------------------------------------------------------------------------------------------------------------------------------------------------------------------------------------------------------------------------------------------------------------------------------------------------------------------------------------------------------------------------------------------------------------------------------------------------------------------------------------------------------------------------------------------------------------------------------------------------------------------------------------------------------------------------------------------------------------------------------------------------------------------------------------------------------------------------------------------------------------------------------------------------------------------------------|
| Zn <sub>1</sub> <sup>s</sup> *P <sub>hcp</sub> | *COOH | 1 f = 104.819031 THz 658.597395 2P <sub>i</sub> THz 3496.386414 cm-1 433.496822 meV<br>2 f = 44.500297 THz 279.603614 2P <sub>i</sub> THz 1484.370093 cm-1 184.038502 meV<br>3 f = 37.231596 THz 233.933019 2P <sub>i</sub> THz 1241.912335 cm-1 153.977561 meV<br>4 f = 32.143204 THz 201.961706 2P <sub>i</sub> THz 1072.181839 cm-1 132.933654 meV<br>5 f = 20.428879 THz 128.358432 2P <sub>i</sub> THz 681.434029 cm-1 84.487082 meV<br>6 f = 19.168313 THz 120.438061 2P <sub>i</sub> THz 639.386069 cm-1 79.273798 meV<br>7 f = 10.714182 THz 67.319193 2P <sub>i</sub> THz 357.386642 cm-1 44.310312 meV<br>8 f = 6.833177 THz 42.934119 2P <sub>i</sub> THz 227.930254 cm-1 28.259760 meV<br>9 f = 6.299788 THz 39.582734 2P <sub>i</sub> THz 210.138294 cm-1 26.053837 meV<br>10 f = 3.325887 THz 20.897165 2P <sub>i</sub> THz 110.939659 cm-1 13.754768 meV<br>11 f = 1.448177 THz 9.099167 2P <sub>i</sub> THz 48.305977 cm-1 5.989182 meV<br>12 f = 1.240532 THz 7.794495 2P <sub>i</sub> THz 41.379706 cm-1 5.130432 meV   |
|                                                | *CO   | 1 f = 60.192582 THz 378.201146 2P <sub>i</sub> THz 2007.808351 cm-1 248.936598 meV<br>2 f = 10.482134 THz 65.861188 2P <sub>i</sub> THz 349.646329 cm-1 43.350635 meV<br>3 f = 9.133083 THz 57.384851 2P <sub>i</sub> THz 304.646837 cm-1 37.771407 meV<br>4 f = 7.828181 THz 49.185912 2P <sub>i</sub> THz 261.120006 cm-1 32.374766 meV<br>5 f = 4.394400 THz 27.610830 2P <sub>i</sub> THz 146.581405 cm-1 18.173784 meV<br>6 f = 3.461563 THz 21.749643 2P <sub>i</sub> THz 115.465317 cm-1 14.315880 meV                                                                                                                                                                                                                                                                                                                                                                                                                                                                                                                             |
|                                                | *COH  | 1 f = 67.189440 THz 422.163699 2P <sub>i</sub> THz 2241.198391 cm-1 277.873286 meV<br>2 f = 51.817684 THz 325.580113 2P <sub>i</sub> THz 1728.451849 cm-1 214.300794 meV<br>3 f = 34.179253 THz 214.754582 2P <sub>i</sub> THz 1140.097134 cm-1 141.354080 meV<br>4 f = 18.710164 THz 117.559425 2P <sub>i</sub> THz 624.103861 cm-1 77.379045 meV<br>5 f = 11.212909 THz 70.452788 2P <sub>i</sub> THz 374.022387 cm-1 46.372882 meV<br>6 f = 6.761561 THz 42.484141 2P <sub>i</sub> THz 225.541394 cm-1 27.963579 meV<br>7 f = 4.705261 THz 29.564026 2P <sub>i</sub> THz 156.950603 cm-1 19.459402 meV<br>8 f = 4.347086 THz 27.313547 2P <sub>i</sub> THz 145.003178 cm-1 17.978109 meV<br>9 f = 3.273961 THz 20.570905 2P <sub>i</sub> THz 109.207588 cm-1 13.540020 meV                                                                                                                                                                                                                                                             |
|                                                | *H    | 1 f = 39.772928 THz 249.900679 2P <sub>i</sub> THz 1326.682046 cm-1 164.487669 meV<br>2 f = 36.051957 THz 226.521128 2P <sub>i</sub> THz 1202.563812 cm-1 149.098964 meV<br>3 f = 7.204784 THz 45.268993 2P <sub>i</sub> THz 240.325720 cm-1 29.796602 meV                                                                                                                                                                                                                                                                                                                                                                                                                                                                                                                                                                                                                                                                                                                                                                                |
| Zn <sub>1</sub> <sup>s</sup> S <sub>hcp</sub>  | *COOH | 1 f = 105.648753 THz 663.810695 2P <sub>i</sub> THz 3524.062976 cm-1 436.928280 meV<br>2 f = 49.785340 THz 312.810516 2P <sub>i</sub> THz 1660.660134 cm-1 205.895689 meV<br>3 f = 37.021901 THz 232.615467 2P <sub>i</sub> THz 1234.917669 cm-1 153.110332 meV<br>4 f = 29.406500 THz 185.331978 2P <sub>i</sub> THz 983.897319 cm-1 121.987764 meV<br>5 f = 19.330315 THz 121.455953 2P <sub>i</sub> THz 644.789891 cm-1 79.943786 meV<br>6 f = 18.881861 THz 118.638231 2P <sub>i</sub> THz 629.831063 cm-1 78.089128 meV<br>7 f = 11.182993 THz 70.264815 2P <sub>i</sub> THz 373.024473 cm-1 46.249157 meV<br>8 f = 7.152978 THz 44.943487 2P <sub>i</sub> THz 238.597659 cm-1 29.582350 meV<br>9 f = 5.772513 THz 36.269769 2P <sub>i</sub> THz 192.550305 cm-1 23.873204 meV<br>10 f = 4.340004 THz 27.269048 2P <sub>i</sub> THz 144.766940 cm-1 17.948820 meV<br>11 f = 3.164860 THz 19.885401 2P <sub>i</sub> THz 105.568359 cm-1 13.088813 meV<br>12 f = 0.611036 THz 3.839255 2P <sub>i</sub> THz 20.381982 cm-1 2.527045 meV |
|                                                | *CO   | 1 f = 60.592980 THz 380.716922 2P <sub>i</sub> THz 2021.164193 cm-1 250.592512 meV<br>2 f = 10.892019 THz 68.436573 2P <sub>i</sub> THz 363.318631 cm-1 45.045785 meV<br>3 f = 9.804700 THz 62.107404 2P <sub>i</sub> THz 329.718103 cm-1 40.879849 meV<br>4 f = 8.517143 THz 53.514790 2P <sub>i</sub> THz 284.101315 cm-1 35.224086 meV<br>5 f = 4.555906 THz 28.625601 2P <sub>i</sub> THz 151.968659 cm-1 18.841719 meV<br>6 f = 3.861044 THz 24.259467 2P <sub>i</sub> THz 128.789564 cm-1 15.967877 meV                                                                                                                                                                                                                                                                                                                                                                                                                                                                                                                             |
|                                                | *COH  | 1 f = 80.902833 THz 508.327491 2P <sub>i</sub> THz 2698.627943 cm-1 334.587342 meV<br>2 f = 50.798616 THz 319.177118 2P <sub>i</sub> THz 1694.459388 cm-1 210.086264 meV<br>3 f = 35.298689 THz 221.788202 2P <sub>i</sub> THz 1177.437479 cm-1 145.983694 meV<br>4 f = 19.504157 THz 122.548230 2P <sub>i</sub> THz 650.588612 cm-1 80.662737 meV<br>5 f = 11.067933 THz 74.588424 2P <sub>i</sub> THz 395.871629 cm-1 49.081844 meV<br>6 f = 7.459763 THz 46.864790 2P <sub>i</sub> THz 248.797545 cm-1 30.846975 meV<br>7 f = 4.752244 THz 29.859227 2P <sub>i</sub> THz 158.517770 cm-1 19.653707 meV<br>8 f = 3.748268 THz 23.551062 2P <sub>i</sub> THz 125.028757 cm-1 15.501506 meV<br>9 f = 2.716063 THz 17.065524 2P <sub>i</sub> THz 90.598092 cm-1 11.232736 meV                                                                                                                                                                                                                                                              |
|                                                | *H    | 1 f = 32.373810 THz 203.410650 2P <sub>i</sub> THz 1079.874045 cm-1 133.887366 meV<br>2 f = 27.234779 THz 171.121161 2P <sub>i</sub> THz 908.454402 cm-1 112.634031 meV<br>3 f = 24.509943 THz 154.000515 2P <sub>i</sub> THz 817.563678 cm-1 101.365014 meV                                                                                                                                                                                                                                                                                                                                                                                                                                                                                                                                                                                                                                                                                                                                                                              |
| Zn <sub>1</sub> <sup>s</sup> *S <sub>hcp</sub> | *COOH | 1 f = 105.065024 THz 660.143013 2P <sub>i</sub> THz 3504.591851 cm-1 434.514167 meV<br>2 f = 49.024451 THz 308.029713 2P <sub>i</sub> THz 1635.279629 cm-1 202.748907 meV<br>3 f = 36.509871 THz 229.398286 2P <sub>i</sub> THz 1217.838174 cm-1 150.992744 meV<br>4 f = 29.440659 THz 184.981116 2P <sub>i</sub> THz 982.034648 cm-1 121.756822 meV<br>5 f = 19.490304 THz 122.461189 2P <sub>i</sub> THz 650.126528 cm-1 80.605445 meV<br>6 f = 18.804145 THz 118.149926 2P <sub>i</sub> THz 627.238736 cm-1 77.767720 meV<br>7 f = 10.917732 THz 68.598130 2P <sub>i</sub> THz 364.176312 cm-1 45.152124 meV<br>8 f = 7.503282 THz 47.144510 2P <sub>i</sub> THz 250.282533 cm-1 31.031090 meV<br>9 f = 6.105876 THz 38.364353 2P <sub>i</sub> THz 203.670108 cm-1 25.251884 meV<br>10 f = 4.693333 THz 29.489080 2P <sub>i</sub> THz 156.552726 cm-1 19.410071 meV<br>11 f = 3.605518 THz 22.654136 2P <sub>i</sub> THz 120.267122 cm-1 14.911228 meV<br>12 f = 1.322495 THz 8.309481 2P <sub>i</sub> THz 44.113684 cm-1 5.469402 meV |
|                                                | *CO   | 1 f = 60.007747 THz 377.039795 2P <sub>i</sub> THz 2001.642927 cm-1 248.172183 meV<br>2 f = 10.623037 THz 66.746511 2P <sub>i</sub> THz 354.346365 cm-1 43.933366 meV<br>3 f = 8.912066 THz 55.996163 2P <sub>i</sub> THz 297.274518 cm-1 36.857356 meV<br>4 f = 7.538649 THz 47.366729 2P <sub>i</sub> THz 251.462259 cm-1 31.177358 meV<br>5 f = 5.805409 THz 36.476462 2P <sub>i</sub> THz 193.647602 cm-1 24.009251 meV<br>6 f = 2.805869 THz 17.629792 2P <sub>i</sub> THz 93.593696 cm-1 11.604144 meV                                                                                                                                                                                                                                                                                                                                                                                                                                                                                                                              |
|                                                | *COH  | 1 f = 73.009573 THz 458.732678 2P <sub>i</sub> THz 2435.337148 cm-1 301.943433 meV<br>2 f = 50.818956 THz 319.304292 2P <sub>i</sub> THz 1695.134533 cm-1 210.169072 meV<br>3 f = 34.657641 THz 217.760383 2P <sub>i</sub> THz 1156.054441 cm-1 143.332535 meV<br>4 f = 18.529595 THz 116.424816 2P <sub>i</sub> THz 618.080406 cm-1 76.632321 meV<br>5 f = 11.365641 THz 71.412428 2P <sub>i</sub> THz 379.116964 cm-1 47.004530 meV<br>6 f = 4.998283 THz 31.405137 2P <sub>i</sub> THz 166.724763 cm-1 20.671244 meV<br>7 f = 4.188328 THz 26.316039 2P <sub>i</sub> THz 139.707570 cm-1 17.321537 meV<br>8 f = 4.392024 THz 27.595899 2P <sub>i</sub> THz 146.502138 cm-1 18.163957 meV<br>9 f = 1.024320 THz 6.435994 2P <sub>i</sub> THz 34.167644 cm-1 4.236249 meV                                                                                                                                                                                                                                                                |
|                                                | *H    | 1 f = 33.054071 THz 207.684855 2P <sub>i</sub> THz 1102.565106 cm-1 136.700700 meV<br>2 f = 29.428381 THz 184.903971 2P <sub>i</sub> THz 981.625099 cm-1 121.706045 meV<br>3 f = 23.000863 THz 144.518683 2P <sub>i</sub> THz 767.226174 cm-1 95.123956 meV                                                                                                                                                                                                                                                                                                                                                                                                                                                                                                                                                                                                                                                                                                                                                                               |

|                                                   |       |                                                                                                                                                                                                                                                                                                                                                                                                                                                                                                                                                                                                                                                                                                                                                                                                                                                                                                                                                                                                                                                                                                                                                                                              |
|---------------------------------------------------|-------|----------------------------------------------------------------------------------------------------------------------------------------------------------------------------------------------------------------------------------------------------------------------------------------------------------------------------------------------------------------------------------------------------------------------------------------------------------------------------------------------------------------------------------------------------------------------------------------------------------------------------------------------------------------------------------------------------------------------------------------------------------------------------------------------------------------------------------------------------------------------------------------------------------------------------------------------------------------------------------------------------------------------------------------------------------------------------------------------------------------------------------------------------------------------------------------------|
| Zn <sub>1</sub> <sup>s</sup> Cl <sub>bril</sub>   | *COOH | 1 f = 104.813875 THz 658.565002 2P <sub>i</sub> THz 3496.214444 cm <sup>-1</sup> 433.475501 meV<br>2 f = 43.972572 THz 276.287820 2P <sub>i</sub> THz 1466.767084 cm <sup>-1</sup> 181.856006 meV<br>3 f = 37.767021 THz 237.297194 2P <sub>i</sub> THz 1259.772192 cm <sup>-1</sup> 156.191901 meV<br>4 f = 32.338398 THz 203.188149 2P <sub>i</sub> THz 1078.692826 cm <sup>-1</sup> 133.740913 meV<br>5 f = 20.102488 THz 126.307655 2P <sub>i</sub> THz 670.546791 cm <sup>-1</sup> 83.137236 meV<br>6 f = 19.825048 THz 124.564447 2P <sub>i</sub> THz 661.292383 cm <sup>-1</sup> 81.989835 meV<br>7 f = 10.924816 THz 68.642646 2P <sub>i</sub> THz 364.412637 cm <sup>-1</sup> 45.181425 meV<br>8 f = 9.156890 THz 57.534439 2P <sub>i</sub> THz 305.440978 cm <sup>-1</sup> 37.869868 meV<br>9 f = 6.910827 THz 43.422007 2P <sub>i</sub> THz 230.520370 cm <sup>-1</sup> 28.530894 meV<br>10 f = 5.909205 THz 37.128627 2P <sub>i</sub> THz 197.109842 cm <sup>-1</sup> 24.438515 meV<br>11 f = 5.066605 THz 31.835675 2P <sub>i</sub> THz 169.010417 cm <sup>-1</sup> 20.954629 meV<br>12 f = 2.782841 THz 17.485108 2P <sub>i</sub> THz 92.825592 cm <sup>-1</sup> 11.508911 meV |
|                                                   | *CO   | 1 f = 53.576913 THz 336.633676 2P <sub>i</sub> THz 1787.133413 cm <sup>-1</sup> 221.576383 meV<br>2 f = 8.812312 THz 55.369389 2P <sub>i</sub> THz 293.947077 cm <sup>-1</sup> 36.444806 meV<br>3 f = 8.676272 THz 54.514626 2P <sub>i</sub> THz 289.409278 cm <sup>-1</sup> 35.882190 meV<br>4 f = 7.823036 THz 49.153587 2P <sub>i</sub> THz 260.948396 cm <sup>-1</sup> 32.353489 meV<br>5 f = 5.189590 THz 32.607156 2P <sub>i</sub> THz 173.106083 cm <sup>-1</sup> 21.462427 meV<br>6 f = 4.199959 THz 26.389122 2P <sub>i</sub> THz 140.095556 cm <sup>-1</sup> 17.369641 meV                                                                                                                                                                                                                                                                                                                                                                                                                                                                                                                                                                                                         |
|                                                   | *COH  | 1 f = 83.497917 THz 524.632885 2P <sub>i</sub> THz 2785.190627 cm <sup>-1</sup> 345.319751 meV<br>2 f = 49.564422 THz 311.422451 2P <sub>i</sub> THz 1653.291124 cm <sup>-1</sup> 204.982048 meV<br>3 f = 36.533398 THz 229.546109 2P <sub>i</sub> THz 1218.622945 cm <sup>-1</sup> 151.090043 meV<br>4 f = 20.265265 THz 127.330418 2P <sub>i</sub> THz 675.976474 cm <sup>-1</sup> 83.810431 meV<br>5 f = 12.873750 THz 80.888160 2P <sub>i</sub> THz 429.422080 cm <sup>-1</sup> 53.241571 meV<br>6 f = 7.701657 THz 48.390939 2P <sub>i</sub> THz 256.899624 cm <sup>-1</sup> 31.851505 meV<br>7 f = 5.400103 THz 33.929846 2P <sub>i</sub> THz 180.128033 cm <sup>-1</sup> 22.333038 meV<br>8 f = 4.608274 THz 28.954641 2P <sub>i</sub> THz 153.715477 cm <sup>-1</sup> 19.058297 meV<br>9 f = 4.056064 THz 25.485005 2P <sub>i</sub> THz 135.295743 cm <sup>-1</sup> 16.774540 meV                                                                                                                                                                                                                                                                                                    |
|                                                   | *H    | 1 f = 32.282596 THz 202.837534 2P <sub>i</sub> THz 1076.831464 cm <sup>-1</sup> 133.510134 meV<br>2 f = 26.430394 THz 166.067066 2P <sub>i</sub> THz 881.623036 cm <sup>-1</sup> 109.307365 meV<br>3 f = 24.361535 THz 153.068040 2P <sub>i</sub> THz 812.613322 cm <sup>-1</sup> 100.751247 meV                                                                                                                                                                                                                                                                                                                                                                                                                                                                                                                                                                                                                                                                                                                                                                                                                                                                                             |
| Zn <sub>1</sub> <sup>s</sup> *Cl <sub>bril3</sub> | *COOH | 1 f = 105.364230 THz 662.022980 2P <sub>i</sub> THz 3514.572288 cm <sup>-1</sup> 435.751584 meV<br>2 f = 51.412102 THz 323.031765 2P <sub>i</sub> THz 1714.923083 cm <sup>-1</sup> 212.623440 meV<br>3 f = 35.430428 THz 222.615942 2P <sub>i</sub> THz 1181.831816 cm <sup>-1</sup> 146.528523 meV<br>4 f = 27.142975 THz 170.544342 2P <sub>i</sub> THz 905.392164 cm <sup>-1</sup> 112.254362 meV<br>5 f = 18.495415 THz 116.210117 2P <sub>i</sub> THz 616.940605 cm <sup>-1</sup> 76.490914 meV<br>6 f = 17.492146 THz 109.906397 2P <sub>i</sub> THz 583.475179 cm <sup>-1</sup> 72.341728 meV<br>7 f = 10.667927 THz 67.028560 2P <sub>i</sub> THz 355.843719 cm <sup>-1</sup> 44.119014 meV<br>8 f = 7.267966 THz 45.665978 2P <sub>i</sub> THz 242.433250 cm <sup>-1</sup> 30.057903 meV<br>9 f = 6.625250 THz 41.627671 2P <sub>i</sub> THz 220.994531 cm <sup>-1</sup> 27.399840 meV<br>10 f = 3.732247 THz 23.450402 2P <sub>i</sub> THz 124.404370 cm <sup>-1</sup> 15.435340 meV<br>11 f = 2.807924 THz 17.642784 2P <sub>i</sub> THz 93.662244 cm <sup>-1</sup> 11.612642 meV<br>12 f = 2.112118 THz 13.270830 2P <sub>i</sub> THz 70.452678 cm <sup>-1</sup> 8.735022 meV    |
|                                                   | *CO   | 1 f = 60.961940 THz 383.035167 2P <sub>i</sub> THz 2033.471382 cm <sup>-1</sup> 252.118410 meV<br>2 f = 10.925820 THz 68.648955 2P <sub>i</sub> THz 364.446131 cm <sup>-1</sup> 45.185578 meV<br>3 f = 9.385269 THz 58.969382 2P <sub>i</sub> THz 313.058852 cm <sup>-1</sup> 38.814365 meV<br>4 f = 7.985034 THz 50.171450 2P <sub>i</sub> THz 266.352066 cm <sup>-1</sup> 33.023459 meV<br>5 f = 5.673931 THz 35.650358 2P <sub>i</sub> THz 189.261948 cm <sup>-1</sup> 23.465499 meV<br>6 f = 1.673745 THz 10.516452 2P <sub>i</sub> THz 55.830131 cm <sup>-1</sup> 6.922057 meV                                                                                                                                                                                                                                                                                                                                                                                                                                                                                                                                                                                                          |
|                                                   | *COH  | 1 f = 81.474700 THz 511.920638 2P <sub>i</sub> THz 2717.703374 cm <sup>-1</sup> 336.952395 meV<br>2 f = 51.001157 THz 320.449720 2P <sub>i</sub> THz 1701.215425 cm <sup>-1</sup> 210.923906 meV<br>3 f = 35.092458 THz 220.492417 2P <sub>i</sub> THz 1170.558369 cm <sup>-1</sup> 145.130793 meV<br>4 f = 19.390480 THz 121.833982 2P <sub>i</sub> THz 646.796787 cm <sup>-1</sup> 80.192610 meV<br>5 f = 12.486679 THz 78.456116 2P <sub>i</sub> THz 416.510755 cm <sup>-1</sup> 51.640771 meV<br>6 f = 7.368235 THz 46.295984 2P <sub>i</sub> THz 245.777848 cm <sup>-1</sup> 30.472580 meV<br>7 f = 4.095171 THz 25.730720 2P <sub>i</sub> THz 136.600208 cm <sup>-1</sup> 16.936273 meV<br>8 f = 2.652494 THz 16.666114 2P <sub>i</sub> THz 88.477687 cm <sup>-1</sup> 10.969839 meV<br>9 f = 1.851806 THz 11.635242 2P <sub>i</sub> THz 61.769606 cm <sup>-1</sup> 7.658458 meV                                                                                                                                                                                                                                                                                                       |
|                                                   | *H    | 1 f = 43.072222 THz 270.630755 2P <sub>i</sub> THz 1436.734648 cm <sup>-1</sup> 178.132458 meV<br>2 f = 34.870338 THz 219.096793 2P <sub>i</sub> THz 1163.149224 cm <sup>-1</sup> 144.212176 meV<br>3 f = 4.148571 THz 26.066237 2P <sub>i</sub> THz 138.381412 cm <sup>-1</sup> 17.157115 meV                                                                                                                                                                                                                                                                                                                                                                                                                                                                                                                                                                                                                                                                                                                                                                                                                                                                                               |

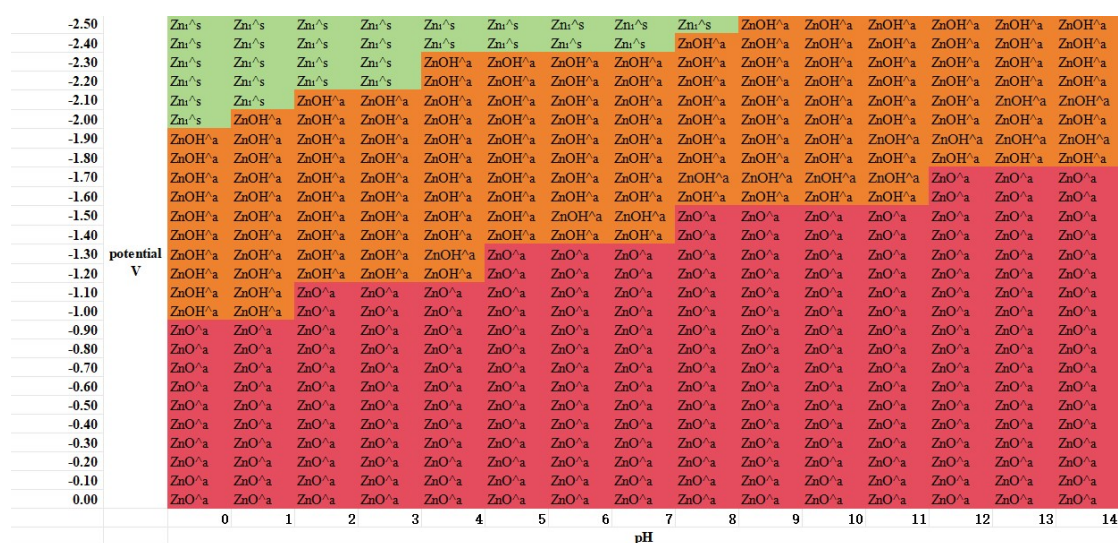

Figure S3. Distribution of oxidized and reduced clusters formed under different pH and reduction potentials.

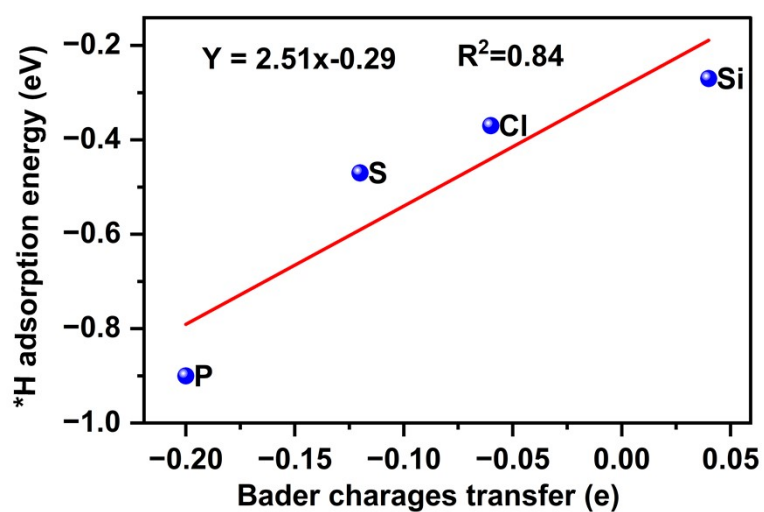

**Figure S4** Functional relationship between H adsorption energy and Bader charge transfer in  $\text{CuZn}_1^s\text{X}$ .

**Table S3.** Gibbs Free Energies of Reaction Intermediates (in eV).

| intermediates<br>CuZnX                      | *COOH | *CO   | *COH | *H    |
|---------------------------------------------|-------|-------|------|-------|
| $\text{CuZn}_1^s\text{Si}_{\text{fcc}}$     | 0.51  | 0.30  | 1.28 | -0.12 |
| $\text{CuZn}_1^s\text{P}_{\text{hcp}}$      | -0.16 | -0.24 | 0.22 | -0.74 |
| $\text{CuZn}_1^s\text{S}_{\text{hcp}}$      | 0.46  | 0.38  | 1.04 | -0.31 |
| $\text{CuZn}_1^s\text{Cl}_{\text{bri1}}$    | 0.75  | 0.31  | 1.13 | -0.21 |
| $\text{CuZn}_1^s$                           | 0.86  | 0.36  | 1.16 | -0.21 |
| $\text{CuZn}_1^{s*}\text{Si}_{\text{hcp}}$  | 0.82  | 0.35  | 0.96 | -0.08 |
| $\text{CuZn}_1^{s*}\text{P}_{\text{hcp}}$   | 1.13  | 0.27  | 1.41 | -0.12 |
| $\text{CuZn}_1^{s*}\text{S}_{\text{hcp}}$   | 1.20  | 0.35  | 1.46 | -0.17 |
| $\text{CuZn}_1^{s*}\text{Cl}_{\text{bri3}}$ | 0.88  | 0.34  | 1.07 | 0.10  |
| $\text{CuZn}_1^{s*}$                        | 0.46  | 0.32  | 1.08 | -0.23 |
